# Supplementary material for: Enhancement of photochemical hydrogen evolution over Pt-loaded hierarchical titania photonic crystal
Source: Royal Society of Chemistry journal article supplement (doi:10.1039/c0ee00116c), 2010-01-01
Supplement: c0ee00116c.pdf [file c0ee00116c.pdf]

Electronic Supplementary Information (ESI):

**Enhancement of photochemical hydrogen evolution over Pt-loaded hierarchical titania photonic crystal**

Jian Liu,<sup>ab</sup> Guilin Liu,<sup>ab</sup> Mingzhu Li,<sup>\*a</sup> Weizhi Shen,<sup>ab</sup> Zhaoyue Liu,<sup>c</sup> Jingxia Wang,<sup>a</sup>

Jincai Zhao,<sup>a</sup> Lei Jiang,<sup>a</sup> and Yanlin Song<sup>\*a</sup>

*<sup>a</sup>Beijing National Laboratory for Molecular Sciences (BNLMS), Key Laboratory of Organic Solids, Laboratory of New Materials, Key Laboratory of Photochemistry, Institute of Chemistry, Chinese Academy of Sciences, Beijing, 100190, P. R. China  
E-mail: ylsong@iccas.ac.cn; mingzhu@iccas.ac.cn; Fax: (+86) 10- 6252 9284.*

*<sup>b</sup>Graduate University of Chinese Academy of Science, Beijing, 100049, P. R. China*

*<sup>c</sup>School of Chemistry and Environment, Beihang University, Beijing 100191, P. R. China*

## Experimental section:

*Synthesizing Procedure.* In a typical synthesis, tetrabutyl titanate was dissolved in ethyl alcohol with stirring for 1 hour. Then certain amount of acetic acid, hydrochloric acid and ethyl alcohol were mixed homogenously and followed with adding dropwise into the above solution and stirred for another 3 hours. Thus, the molar ratio of ethyl alcohol, tetrabutyl titanate, hydrochloric acid, acetic acid in the precursor sol was 10:1:0.7:0.6. Before the P(St-MMA-AA) colloidal crystal films<sup>s1</sup> were infiltrated with TiO<sub>2</sub> precursor through dip-coating method, the films were annealed at 80 °C for half an hour. The as-infiltrated films were left to dry and subsequently programmed to 450 °C at a ramp rate of 1 °C /min and calcined for 4 hours to remove the colloidal crystal templates.

For photodeposition of platinum nanoparticles, 10 mg of i-TiO<sub>2</sub> PC segments scrapped from the substrate was suspended in a mixture of 20% (v/v) aqueous methanol containing certain amount of H<sub>2</sub>PtCl<sub>6</sub>·6H<sub>2</sub>O aqueous solution. The suspension was thoroughly flushed with nitrogen to remove oxygen and CO<sub>2</sub>. The reaction mixture was irradiated with a Xenon lamp. After reaction, the product was collected by filtration, washed twice with 10 ml aliquots of water, and stored in fresh 20% (v/v) methanol aqueous solutions for further uses.

*Photocatalytic Water Splitting.* The photosplitting of water was performed in LabSolarH2 system. Prior to use, the reaction setup was vacuumed and should be air-free. The stirred mixture containing PC segments and methanol aqueous solution in the quartz reaction cell was successively irradiated for 8 hours with periodic detection

of gaseous samples every 2 hours. Gaseous samples were analyzed with a Techcomp gas chromatograph employing a molecular 60/80 sieve 5A column with Ar gas the carrier gas and a thermal conductivity detector.

The quantum yield (QY) was measured under the same photocatalytic reaction condition with irradiation light by using 500 W Xe lamp, and the QY was calculated according to Eq. (1):

$$\begin{aligned} \text{QY [\%]} &= \frac{\text{number of reacted electrons}}{\text{number of incident photos}} \times 100 \\ &= \frac{\text{number of evolved H}_2 \text{ molecules} \times 2}{\text{number of incident photos}} \times 100 \end{aligned} \quad (1)$$

The number of incident photos was  $6.9 \cdot 10^{17}$  photons/s.

*Characterization.* SEM images were taken by JEOL FE-SEM 6700F microscopy operating at 3.0 kV. TEM images were obtained on a JEOL JEM-2010 transmission electron microscope operating at 200 kV. Samples obtained by scratching the films from the substrate for TEM measurements were dispersed in ethanol. Carbon coated copper grids were used as the sample holder. XRD patterns were collected on a Rigaku D/MAX 2500 X-ray powder diffractometer using a high-power Cu K $\alpha$  radiation. XPS data were obtained with an ESCALab220i-XL electron spectrometer from VG Scientific using 300W Al K $\alpha$  radiation. Reflectance spectra were measured by Ocean optics fiber spectrophotometer. The diffuse reflectance UV/Vis spectra (DRS) were recorded in Hitachi U-4100 spectroscopy. The nitrogen adsorption and desorption isotherms at the temperature of liquid nitrogen (77 K) were measured on a Quantachrome Autosorb-1 sorption analyzer with prior degassing under vacuum at 300

°C overnight. Multipoint BET surface area was estimated from the relative pressure range from 0.05 to 0.2.

## Reference

S1. Wang, J. X.; Wen, Y. Q.; Ge, H. L.; Sun, Z. W.; Zheng, Y. M.; Song, Y. L.; Jiang, L. Simple fabrication of full color colloidal crystal films with tough mechanical strength. *Macromol. Chem. Phys.* **2006**, *207*, 596–604

**Supplementary Figures:**

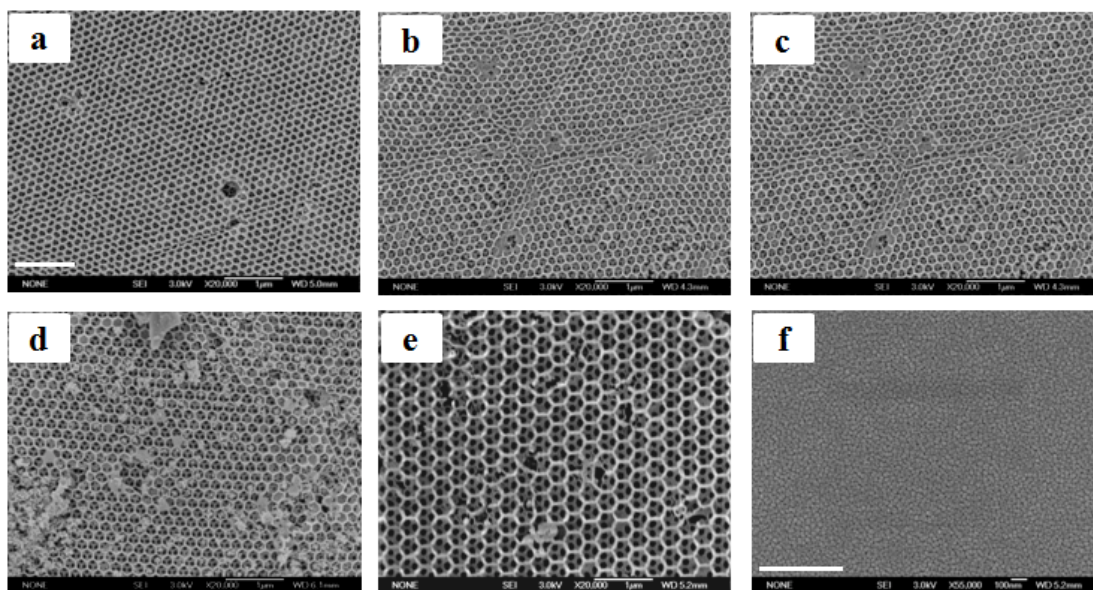

Figure S1. SEM image of a series of i-TiO<sub>2</sub> PC films and nc-TiO<sub>2</sub> films. (a) i-TiO<sub>2</sub>-120; (b) i-TiO<sub>2</sub>-133; (c) i-TiO<sub>2</sub>-150; (d) i-TiO<sub>2</sub>-170; (e) i-TiO<sub>2</sub>-300. The scale bars of (a-e) and (f) were 1 μm and 500 nm, respectively.

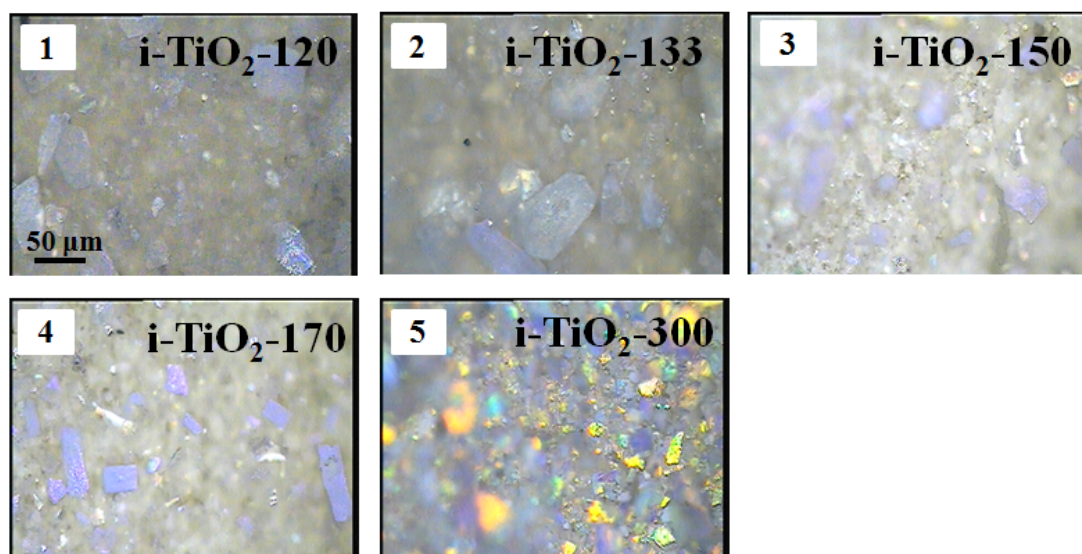

Figure S2. Optical microscopy images of different PC segments recollected from methanol aqueous solutions after photocatalytic water splitting experiment. The scale bar is 50  $\mu\text{m}$ .

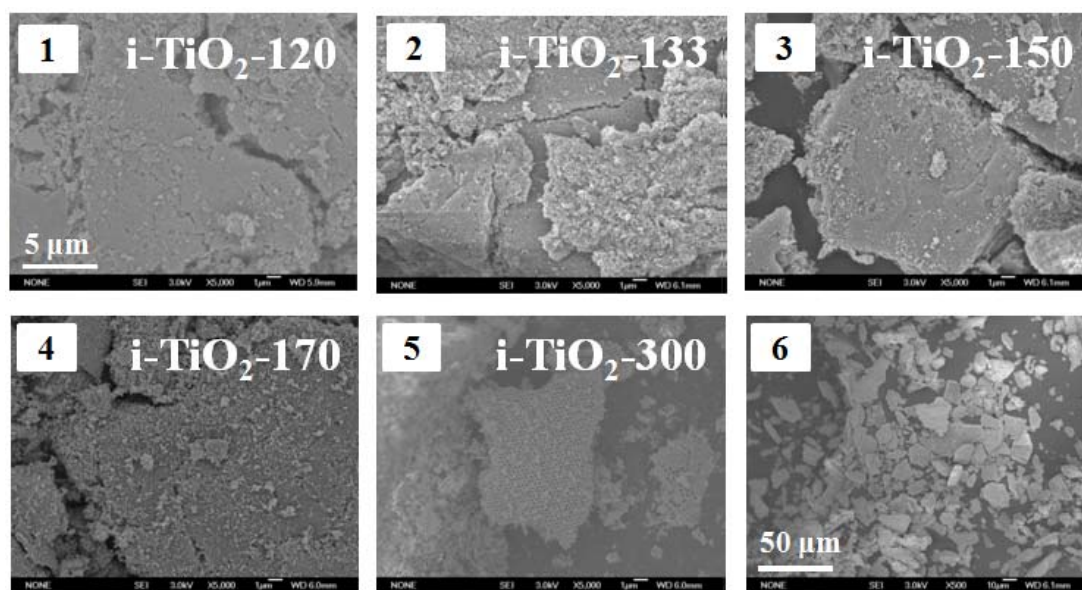

Figure S3. SEM images of different PC segments recollected from methanol aqueous solutions after photocatalytic water splitting experiment. The scale bars of 1-5 and 6 were 5  $\mu\text{m}$  and 50  $\mu\text{m}$ , respectively.

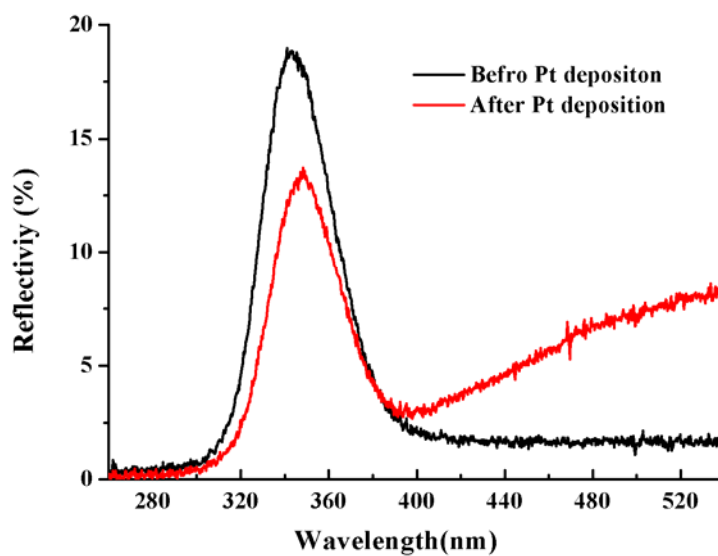

Figure S4. Reflectance spectra comparisons between before Pt deposition and after Pt deposition.

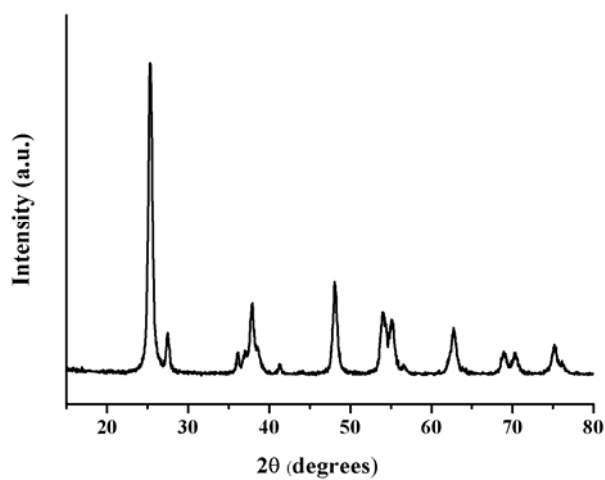

Figure S5. X-ray diffraction pattern of i-TiO<sub>2</sub> calcined at 450 °C for 4 hours indicating good anatase crystallinity.

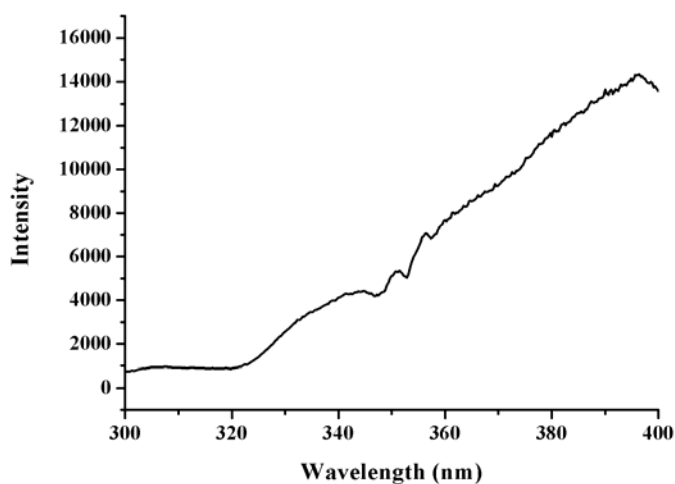

Figure S6. The spectrum of Xenon lamp in the UV region (300-400 nm), indicating that the light intensity in the region nearly linearly increased.

Table S1. Photocatalytic H<sub>2</sub> evolution over Pt loaded TiO<sub>2</sub> photonic crystals.

| Catalysts                  | H <sub>2</sub> evolution rate (μmol/h) | QY (%) |
|----------------------------|----------------------------------------|--------|
| i-Pt-TiO <sub>2</sub> -120 | 238                                    | 11.5   |
| i-Pt-TiO <sub>2</sub> -133 | 247                                    | 11.9   |
| i-Pt-TiO <sub>2</sub> -150 | 179                                    | 8.6    |
| i-Pt-TiO <sub>2</sub> -170 | 197                                    | 9.5    |
| i-Pt-TiO <sub>2</sub> -300 | 128                                    | 6.2    |
| nc-TiO <sub>2</sub>        | 99                                     | 4.8    |

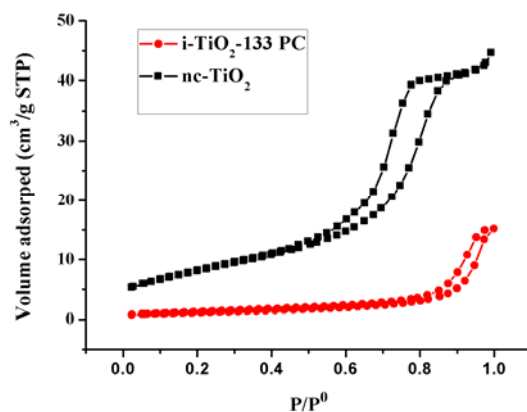

Figure S7. Nitrogen adsorption-desorption isotherms of i-TiO<sub>2</sub>-133 PC and nc-TiO<sub>2</sub>.

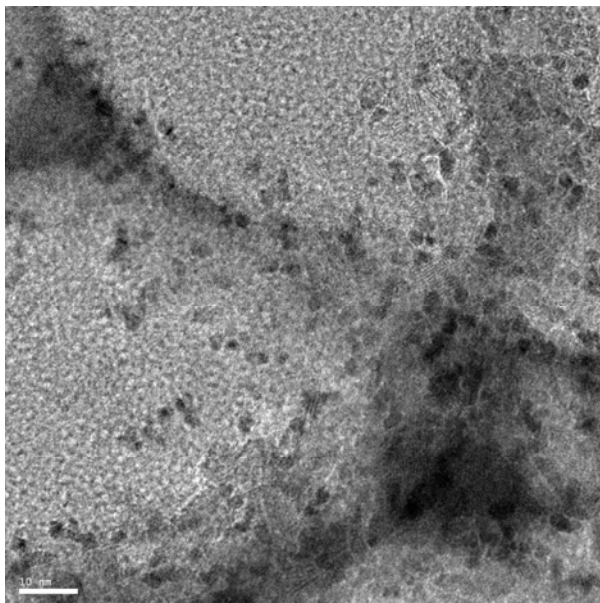

Figure S8. TEM image of Pt-loaded i-TiO<sub>2</sub> PC.

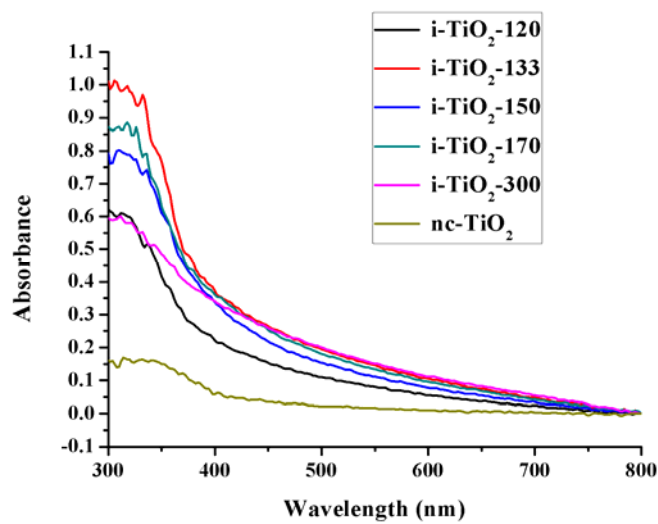

Figure S9. Diffuse reflectance UV-vis spectroscopy of i-TiO<sub>2</sub> PCs and nc-TiO<sub>2</sub>.
